# Supplementary material for: A systematic study on ternary inclusion crystals consisting of dianilines and three positional isomers of ditoluoyl-l-tartaric acid
Source: Royal Society of Chemistry journal article supplement (doi:10.1039/c5ce01769f), 2015-11-30
Supplement: c5ce01769f1.pdf [file c5ce01769f1.pdf]

## Supporting Information

### **A systematic study on ternary inclusion crystals consisting of dianilines and three positional isomers of ditoluoyl-L-tartaric acid**

Koichi Kodama\*, Yuya Morita, Eriko Sekine and Takuji Hirose\*

*Graduate School of Science and Engineering, Saitama University,*

*255 Shimo-Ohkubo, Sakura, Saitama 338-8570, Japan*

Table S1. Crystallographic data of the inclusion crystals reported in this study and previous study.

|                                                                 | <b>1b•2M•2-BuOH•2H<sub>2</sub>O (A1)</b>                                                                                                                                                 | <b>1b•2O•2H<sub>2</sub>O (A2)</b>                                                                                                                                                           | <b>1o•2M•3H<sub>2</sub>O (B1)</b>                                                                                                                     | <b>1o•2O•3H<sub>2</sub>O (B2)</b>                                                                                                                      |
|-----------------------------------------------------------------|------------------------------------------------------------------------------------------------------------------------------------------------------------------------------------------|---------------------------------------------------------------------------------------------------------------------------------------------------------------------------------------------|-------------------------------------------------------------------------------------------------------------------------------------------------------|--------------------------------------------------------------------------------------------------------------------------------------------------------|
| formula                                                         | C <sub>35</sub> H <sub>42</sub> N <sub>2</sub> O <sub>11</sub>                                                                                                                           | C <sub>30</sub> H <sub>30</sub> N <sub>2</sub> O <sub>11</sub>                                                                                                                              | C <sub>33</sub> H <sub>38</sub> N <sub>2</sub> O <sub>11</sub>                                                                                        | C <sub>32</sub> H <sub>36</sub> N <sub>2</sub> O <sub>12</sub>                                                                                         |
| moiety formula                                                  | (C <sub>18</sub> H <sub>12</sub> O <sub>8</sub> ) <sup>2-</sup> • (C <sub>13</sub> H <sub>16</sub> N <sub>2</sub> ) <sup>2+</sup> • C <sub>4</sub> H <sub>10</sub> O • 2H <sub>2</sub> O | (C <sub>18</sub> H <sub>12</sub> O <sub>8</sub> ) <sup>2-</sup> • (C <sub>12</sub> H <sub>14</sub> N <sub>2</sub> O) <sup>2+</sup> • 2H <sub>2</sub> O                                      | (C <sub>20</sub> H <sub>16</sub> O <sub>8</sub> ) <sup>2-</sup> • (C <sub>13</sub> H <sub>16</sub> N <sub>2</sub> ) <sup>2+</sup> • 3H <sub>2</sub> O | (C <sub>20</sub> H <sub>16</sub> O <sub>8</sub> ) <sup>2-</sup> • (C <sub>12</sub> H <sub>14</sub> N <sub>2</sub> O) <sup>2+</sup> • 3H <sub>2</sub> O |
| FW                                                              | 666.71                                                                                                                                                                                   | 594.56                                                                                                                                                                                      | 638.65                                                                                                                                                | 640.63                                                                                                                                                 |
| temperature (K)                                                 | 273                                                                                                                                                                                      | 150                                                                                                                                                                                         | 100                                                                                                                                                   | 150                                                                                                                                                    |
| crystal size (mm)                                               | 0.80 × 0.20 × 0.03                                                                                                                                                                       | 0.50 × 0.15 × 0.05                                                                                                                                                                          | 0.16 × 0.14 × 0.02                                                                                                                                    | 0.21 × 0.20 × 0.06                                                                                                                                     |
| crystal system                                                  | monoclinic                                                                                                                                                                               | monoclinic                                                                                                                                                                                  | monoclinic                                                                                                                                            | monoclinic                                                                                                                                             |
| space group                                                     | <i>P</i> 2 <sub>1</sub>                                                                                                                                                                  | <i>P</i> 2 <sub>1</sub>                                                                                                                                                                     | <i>C</i> 2                                                                                                                                            | <i>C</i> 2                                                                                                                                             |
| <i>a</i> (Å)                                                    | 8.266(3)                                                                                                                                                                                 | 13.029(3)                                                                                                                                                                                   | 13.604(2)                                                                                                                                             | 13.524(2)                                                                                                                                              |
| <i>b</i> (Å)                                                    | 17.153(6)                                                                                                                                                                                | 9.107(2)                                                                                                                                                                                    | 9.974(2)                                                                                                                                              | 9.9285(16)                                                                                                                                             |
| <i>c</i> (Å)                                                    | 12.824(5)                                                                                                                                                                                | 13.565(3)                                                                                                                                                                                   | 13.840(3)                                                                                                                                             | 13.891(3)                                                                                                                                              |
| $\alpha$ (°)                                                    | 90                                                                                                                                                                                       | 90                                                                                                                                                                                          | 90                                                                                                                                                    | 90                                                                                                                                                     |
| $\beta$ (°)                                                     | 103.670(9)                                                                                                                                                                               | 116.569(4)                                                                                                                                                                                  | 119.099(4)                                                                                                                                            | 118.8166(19)                                                                                                                                           |
| $\gamma$ (°)                                                    | 90                                                                                                                                                                                       | 90                                                                                                                                                                                          | 90                                                                                                                                                    | 90                                                                                                                                                     |
| <i>V</i> (Å <sup>3</sup> )                                      | 1766.7(11)                                                                                                                                                                               | 1439.7(5)                                                                                                                                                                                   | 1640.9(6)                                                                                                                                             | 1634.2(5)                                                                                                                                              |
| <i>Z</i>                                                        | 2                                                                                                                                                                                        | 2                                                                                                                                                                                           | 2                                                                                                                                                     | 2                                                                                                                                                      |
| <i>D<sub>c</sub></i> (g/cm <sup>3</sup> )                       | 1.253                                                                                                                                                                                    | 1.372                                                                                                                                                                                       | 1.293                                                                                                                                                 | 1.302                                                                                                                                                  |
| $\mu$ (Mo $\kappa$ <sub>a</sub> ) (mm <sup>-1</sup> )           | 0.093                                                                                                                                                                                    | 0.106                                                                                                                                                                                       | 0.097                                                                                                                                                 | 0.100                                                                                                                                                  |
| $\theta_{\min/\max}$ (°)                                        | 1.63/25.00                                                                                                                                                                               | 1.68/24.99                                                                                                                                                                                  | 1.68/25.00                                                                                                                                            | 1.67/24.99                                                                                                                                             |
| <i>R</i> 1 [ <i>F<sub>o</sub></i> > 2σ( <i>F<sub>o</sub></i> )] | 0.0776                                                                                                                                                                                   | 0.0459                                                                                                                                                                                      | 0.0369                                                                                                                                                | 0.0280                                                                                                                                                 |
| <i>wR</i> 2 (all <i>F<sub>o</sub></i> <sup>2</sup> )            | 0.1951                                                                                                                                                                                   | 0.1026                                                                                                                                                                                      | 0.0972                                                                                                                                                | 0.0777                                                                                                                                                 |
| GOF                                                             | 1.074                                                                                                                                                                                    | 1.142                                                                                                                                                                                       | 1.029                                                                                                                                                 | 1.049                                                                                                                                                  |
| Flack parameter                                                 | -1.5(19)                                                                                                                                                                                 | 0.0(10)                                                                                                                                                                                     | 1.1(10)                                                                                                                                               | 1.2(3)                                                                                                                                                 |
| measured reflns                                                 | 10015                                                                                                                                                                                    | 8149                                                                                                                                                                                        | 3416                                                                                                                                                  | 3938                                                                                                                                                   |
| independent reflns                                              | 5775                                                                                                                                                                                     | 3930                                                                                                                                                                                        | 1956                                                                                                                                                  | 2652                                                                                                                                                   |
| observed reflns                                                 | 3924                                                                                                                                                                                     | 3354                                                                                                                                                                                        | 1845                                                                                                                                                  | 2595                                                                                                                                                   |
| reflins used                                                    | 5775                                                                                                                                                                                     | 3930                                                                                                                                                                                        | 1956                                                                                                                                                  | 2652                                                                                                                                                   |
| parameters                                                      | 455                                                                                                                                                                                      | 428                                                                                                                                                                                         | 234                                                                                                                                                   | 234                                                                                                                                                    |
| CCDC number                                                     | 827717                                                                                                                                                                                   | 1414396                                                                                                                                                                                     | 1414397                                                                                                                                               | 1414398                                                                                                                                                |
|                                                                 | <b>2(1m)•2M•2-BuOH (C1)</b>                                                                                                                                                              | <b>1m•2O•2(2-BuOH)•H<sub>2</sub>O (C2)</b>                                                                                                                                                  | <b>1p•2M (D1)</b>                                                                                                                                     | <b>1p•2O•2(2-PenOH) (D2)</b>                                                                                                                           |
| formula                                                         | C <sub>28.5</sub> H <sub>30</sub> NO <sub>8.5</sub>                                                                                                                                      | C <sub>40</sub> H <sub>52</sub> N <sub>2</sub> O <sub>12</sub>                                                                                                                              | C <sub>33</sub> H <sub>32</sub> N <sub>2</sub> O <sub>8</sub>                                                                                         | C <sub>42</sub> H <sub>54</sub> N <sub>2</sub> O <sub>11</sub>                                                                                         |
| moiety formula                                                  | (C <sub>20</sub> H <sub>17</sub> O <sub>8</sub> ) <sup>-</sup> • 0.5(C <sub>13</sub> H <sub>16</sub> N <sub>2</sub> ) <sup>2+</sup> • 0.5(C <sub>4</sub> H <sub>10</sub> O)              | (C <sub>20</sub> H <sub>16</sub> O <sub>8</sub> ) <sup>2-</sup> • (C <sub>12</sub> H <sub>14</sub> N <sub>2</sub> O) <sup>2+</sup> • 2(C <sub>4</sub> H <sub>10</sub> O) • H <sub>2</sub> O | (C <sub>20</sub> H <sub>17</sub> O <sub>8</sub> ) <sup>-</sup> • (C <sub>13</sub> H <sub>15</sub> N <sub>2</sub> ) <sup>+</sup>                       | (C <sub>12</sub> H <sub>14</sub> N <sub>2</sub> O) <sup>2+</sup> • 2(C <sub>5</sub> H <sub>12</sub> O)                                                 |
| FW                                                              | 522.54                                                                                                                                                                                   | 752.84                                                                                                                                                                                      | 584.60                                                                                                                                                | 762.87                                                                                                                                                 |
| temperature (K)                                                 | 150                                                                                                                                                                                      | 150                                                                                                                                                                                         | 200                                                                                                                                                   | 150                                                                                                                                                    |
| crystal size (mm)                                               | 0.12 × 0.08 × 0.08                                                                                                                                                                       | 0.28 × 0.10 × 0.02                                                                                                                                                                          | 0.18 × 0.03 × 0.01                                                                                                                                    | 0.25 × 0.05 × 0.02                                                                                                                                     |
| crystal system                                                  | monoclinic                                                                                                                                                                               | orthorhombic                                                                                                                                                                                | tetragonal                                                                                                                                            | orthorhombic                                                                                                                                           |
| space group                                                     | <i>C</i> 2                                                                                                                                                                               | <i>P</i> 2 <sub>1</sub> 2 <sub>1</sub> 2 <sub>1</sub>                                                                                                                                       | <i>I</i> 4 <sub>1</sub>                                                                                                                               | <i>P</i> 2 <sub>1</sub> 2 <sub>1</sub> 2 <sub>1</sub>                                                                                                  |
| <i>a</i> (Å)                                                    | 16.286(7)                                                                                                                                                                                | 7.7919(13)                                                                                                                                                                                  | 28.639(5)                                                                                                                                             | 7.7836(8)                                                                                                                                              |
| <i>b</i> (Å)                                                    | 22.708(9)                                                                                                                                                                                | 21.208(4)                                                                                                                                                                                   | 28.639(5)                                                                                                                                             | 22.234(2)                                                                                                                                              |
| <i>c</i> (Å)                                                    | 7.950(3)                                                                                                                                                                                 | 24.416(4)                                                                                                                                                                                   | 7.8757(15)                                                                                                                                            | 24.890(3)                                                                                                                                              |
| $\alpha$ (°)                                                    | 90                                                                                                                                                                                       | 90                                                                                                                                                                                          | 90                                                                                                                                                    | 90                                                                                                                                                     |
| $\beta$ (°)                                                     | 115.707(5)                                                                                                                                                                               | 90                                                                                                                                                                                          | 90                                                                                                                                                    | 90                                                                                                                                                     |
| $\gamma$ (°)                                                    | 90                                                                                                                                                                                       | 90                                                                                                                                                                                          | 90                                                                                                                                                    | 90                                                                                                                                                     |
| <i>V</i> (Å <sup>3</sup> )                                      | 2649.2(19)                                                                                                                                                                               | 4034.7(12)                                                                                                                                                                                  | 6460(3)                                                                                                                                               | 4307.5(8)                                                                                                                                              |
| <i>Z</i>                                                        | 4                                                                                                                                                                                        | 4                                                                                                                                                                                           | 8                                                                                                                                                     | 4                                                                                                                                                      |
| <i>D<sub>c</sub></i> (g/cm <sup>3</sup> )                       | 1.310                                                                                                                                                                                    | 1.239                                                                                                                                                                                       | 1.202                                                                                                                                                 | 1.176                                                                                                                                                  |
| $\mu$ (Mo $\kappa$ <sub>a</sub> )                               | 0.097                                                                                                                                                                                    | 0.091                                                                                                                                                                                       | 0.087                                                                                                                                                 | 0.085                                                                                                                                                  |
| $\theta_{\min/\max}$ (°)                                        | 1.65/25.00                                                                                                                                                                               | 1.27/25.00                                                                                                                                                                                  | 1.005/25.00                                                                                                                                           | 1.23/25.00                                                                                                                                             |
| <i>R</i> 1 [ <i>F<sub>o</sub></i> > 2σ( <i>F<sub>o</sub></i> )] | 0.0667                                                                                                                                                                                   | 0.0853                                                                                                                                                                                      | 0.0547                                                                                                                                                | 0.0719                                                                                                                                                 |
| <i>wR</i> 2 (all <i>F<sub>o</sub></i> <sup>2</sup> )            | 0.1704                                                                                                                                                                                   | 0.2202                                                                                                                                                                                      | 0.1313                                                                                                                                                | 0.1966                                                                                                                                                 |
| GOF                                                             | 1.038                                                                                                                                                                                    | 1.033                                                                                                                                                                                       | 0.910                                                                                                                                                 | 1.028                                                                                                                                                  |
| Flack parameter                                                 | -1.3(10)                                                                                                                                                                                 | 1.0(10)                                                                                                                                                                                     | -2.6(10)                                                                                                                                              | -0.8(7)                                                                                                                                                |
| measured reflns                                                 | 6331                                                                                                                                                                                     | 18894                                                                                                                                                                                       | 15524                                                                                                                                                 | 20564                                                                                                                                                  |
| independent reflns                                              | 4317                                                                                                                                                                                     | 7072                                                                                                                                                                                        | 5607                                                                                                                                                  | 7561                                                                                                                                                   |
| observed reflns                                                 | 3460                                                                                                                                                                                     | 4689                                                                                                                                                                                        | 3031                                                                                                                                                  | 5498                                                                                                                                                   |
| reflins used                                                    | 4317                                                                                                                                                                                     | 7072                                                                                                                                                                                        | 5607                                                                                                                                                  | 7561                                                                                                                                                   |
| parameters                                                      | 349                                                                                                                                                                                      | 454                                                                                                                                                                                         | 396                                                                                                                                                   | 523                                                                                                                                                    |
| CCDC number                                                     | 1414399                                                                                                                                                                                  | 1414400                                                                                                                                                                                     | 1414401                                                                                                                                               | 1414403                                                                                                                                                |

Table S2. Hydrogen bond metrics of the inclusion crystals (**A2**, **B1**, and **B2**)

| Compound name                     | D-H...A      | D-H / Å | H-A / Å | D-A / Å | ∠D-H...A / ° |
|-----------------------------------|--------------|---------|---------|---------|--------------|
| <b>1b•2O•2H<sub>2</sub>O (A2)</b> |              |         |         |         |              |
|                                   | N1-H3...O9   | 1.162   | 1.707   | 2.811   | 156.42       |
|                                   | N1-H5...O6   | 0.847   | 1.92    | 2.722   | 157.69       |
|                                   | N1-H4...O11  | 0.907   | 2.56    | 2.91    | 103.59       |
|                                   | N2-H8...O8   | 0.822   | 2.171   | 2.883   | 144.88       |
|                                   | N2-H9...O7   | 1.054   | 1.622   | 2.671   | 172.55       |
|                                   | N2-H10...O4  | 1.007   | 1.858   | 2.737   | 143.94       |
|                                   | O8-H2...O7   | 0.837   | 2.046   | 2.811   | 151.81       |
|                                   | O8-H1...O4   | 0.930   | 2.042   | 2.951   | 165.17       |
|                                   | O11-H15...O9 | 0.973   | 1.897   | 2.782   | 149.94       |
|                                   | O11-H16...O6 | 0.828   | 2.128   | 2.861   | 147.51       |
| <b>1o•2M•3H<sub>2</sub>O (B1)</b> |              |         |         |         |              |
|                                   | N1-H4...O5   | 0.882   | 1.905   | 2.749   | 159.78       |
|                                   | N1-H5...O2   | 0.891   | 1.878   | 2.757   | 168.69       |
|                                   | N1-H6...O3   | 1.019   | 1.733   | 2.728   | 164.36       |
|                                   | O2-H1...O6   | 0.851   | 1.816   | 2.649   | 165.93       |
|                                   | O6-H2...O3   | 0.813   | 1.994   | 2.758   | 156.11       |
|                                   | O6-H3...O5   | 0.858   | 1.922   | 2.759   | 165.06       |
| <b>1o•2O•3H<sub>2</sub>O (B2)</b> |              |         |         |         |              |
|                                   | N1-H13...O2  | 0.861   | 1.938   | 2.758   | 158.72       |
|                                   | N1-H14...O5  | 0.948   | 1.796   | 2.725   | 165.5        |
|                                   | N1-H15...O1  | 0.921   | 1.843   | 2.752   | 168.39       |
|                                   | O1-H16...O7  | 0.943   | 1.701   | 2.641   | 173.69       |
|                                   | O7-H17...O2  | 0.887   | 1.885   | 2.750   | 164.65       |
|                                   | O7-H18...O5  | 0.930   | 1.842   | 2.747   | 163.66       |

Table S3. Hydrogen bond metrics of the inclusion crystals (C1, C2, D1, and D2)

| Compound name                              | D-H...A     | D-H / Å | H-A / Å | D-A / Å | ∠D-H...A / ° |
|--------------------------------------------|-------------|---------|---------|---------|--------------|
| <b>2(1m)•2M•2-BuOH (C1)</b>                |             |         |         |         |              |
|                                            | N1-H37...O7 | 1.059   | 1.601   | 2.635   | 164.04       |
|                                            | N1-H38...O5 | 0.846   | 2.014   | 2.848   | 168.45       |
|                                            | N1-H39...O3 | 0.948   | 1.833   | 2.778   | 174.21       |
|                                            | O4-H1...O4  | 0.840   | 1.745   | 2.475   | 143.98       |
|                                            | O6-H36...O6 | 0.840   | 1.632   | 2.420   | 155.16       |
| <b>1m•2O•2(2-BuOH)•H<sub>2</sub>O (C2)</b> |             |         |         |         |              |
|                                            | N1-H1...O6  | 1.057   | 1.771   | 2.828   | 179.21       |
|                                            | N1-H2...O4  | 0.882   | 1.941   | 2.737   | 149.39       |
|                                            | N1-H3...O10 | 0.846   | 1.997   | 2.797   | 157.26       |
|                                            | N2-H4...O11 | 0.908   | 1.811   | 2.716   | 174.68       |
|                                            | N2-H5...O4  | 0.911   | 1.844   | 2.753   | 176.54       |
|                                            | N2-H6...O10 | 0.91    | 2.15    | 2.806   | 128.32       |
| <b>1p•2M (D1)</b>                          |             |         |         |         |              |
|                                            | N1-H11...O7 | 0.91    | 2.081   | 2.924   | 153.58       |
|                                            | N1-H12...O8 | 0.91    | 1.957   | 2.801   | 153.58       |
|                                            | N2-H18...O5 | 0.91    | 2.059   | 2.943   | 163.2        |
|                                            | N2-H19...O6 | 0.91    | 1.99    | 2.78    | 144.28       |
|                                            | O4-H12...O3 | 0.839   | 1.605   | 2.431   | 167.23       |
|                                            | N1-H10...N2 | 0.909   | 1.823   | 2.702   | 161.95       |
|                                            | N2-H20...N1 | 0.908   | 1.81    | 2.702   | 166.69       |
| <b>1p•2O•2(2-PenOH) (D2)</b>               |             |         |         |         |              |
|                                            | N1-H2...O1  | 0.995   | 1.793   | 2.703   | 150.31       |
|                                            | N1-H3...O8  | 0.932   | 1.9     | 2.803   | 162.58       |
|                                            | N1-H4...O10 | 0.98    | 1.885   | 2.735   | 143.43       |
|                                            | N2-H7...O1  | 1.032   | 1.683   | 2.712   | 174.79       |
|                                            | N2-H8...O10 | 1.033   | 1.972   | 2.82    | 137.38       |
|                                            | N2-H9...O11 | 1.033   | 1.702   | 2.719   | 167.25       |
|                                            | O8-H1...O6  | 1.049   | 1.764   | 2.792   | 165.73       |

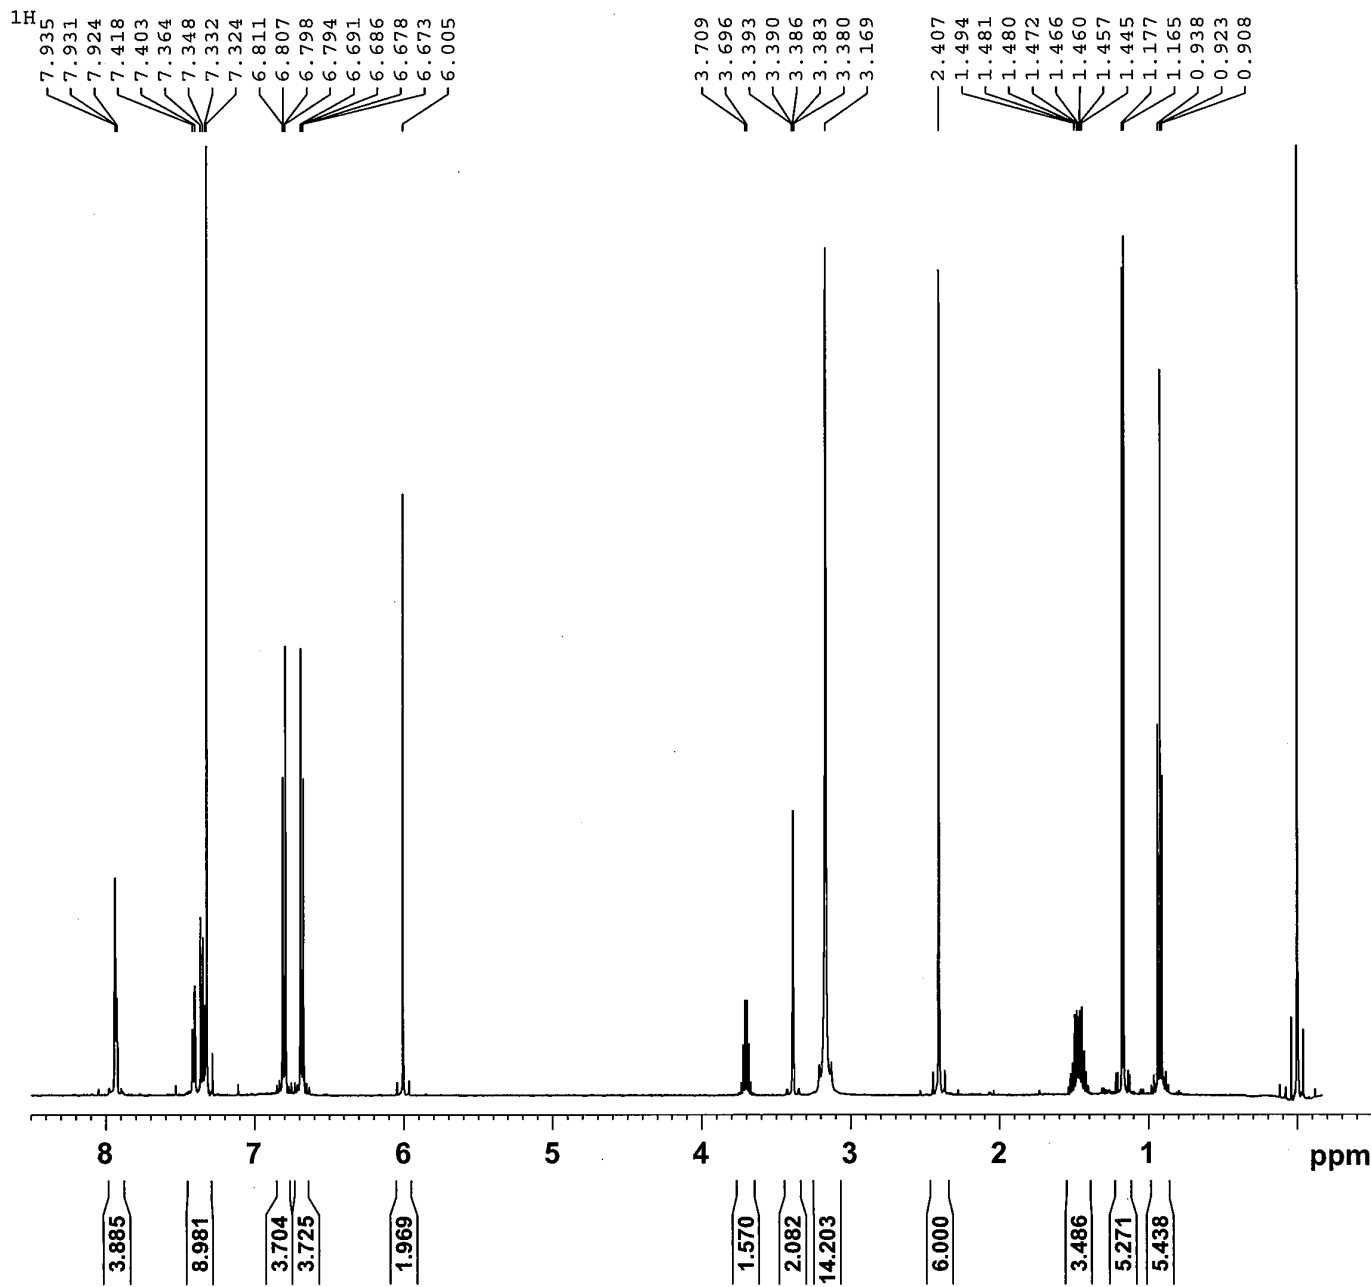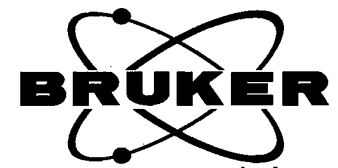

```

NAME          kodama
EXPNO         1
PROCNO       1
Date_        20140111
Time         17.02
INSTRUM      spect
PROBHD       5 mm PABBO BB-
PULPROG      zg30
TD           65536
SOLVENT      MeOD
NS           8
DS           2
SWH          10330.578 Hz
FIDRES       0.157632 Hz
AQ           3.1719923 sec
RG           203
DW           48.400 usec
DE           6.50 usec
TE           299.7 K
D1           1.00000000 sec
TD0          1

```

```

===== CHANNEL f1 =====
NUC1          1H
P1            11.80 usec
PL1           2.40 dB
PL1W         15.17711735 W
SFO1         500.0330885 MHz
SI           32768
SF           500.0280088 MHz
WDW           EM
SSB           0
LB           0.30 Hz
GB           0
PC           1.00

```

Figure S1. <sup>1</sup>H NMR spectrum of **1m·2O** salt obtained from a 2-butanol solution.

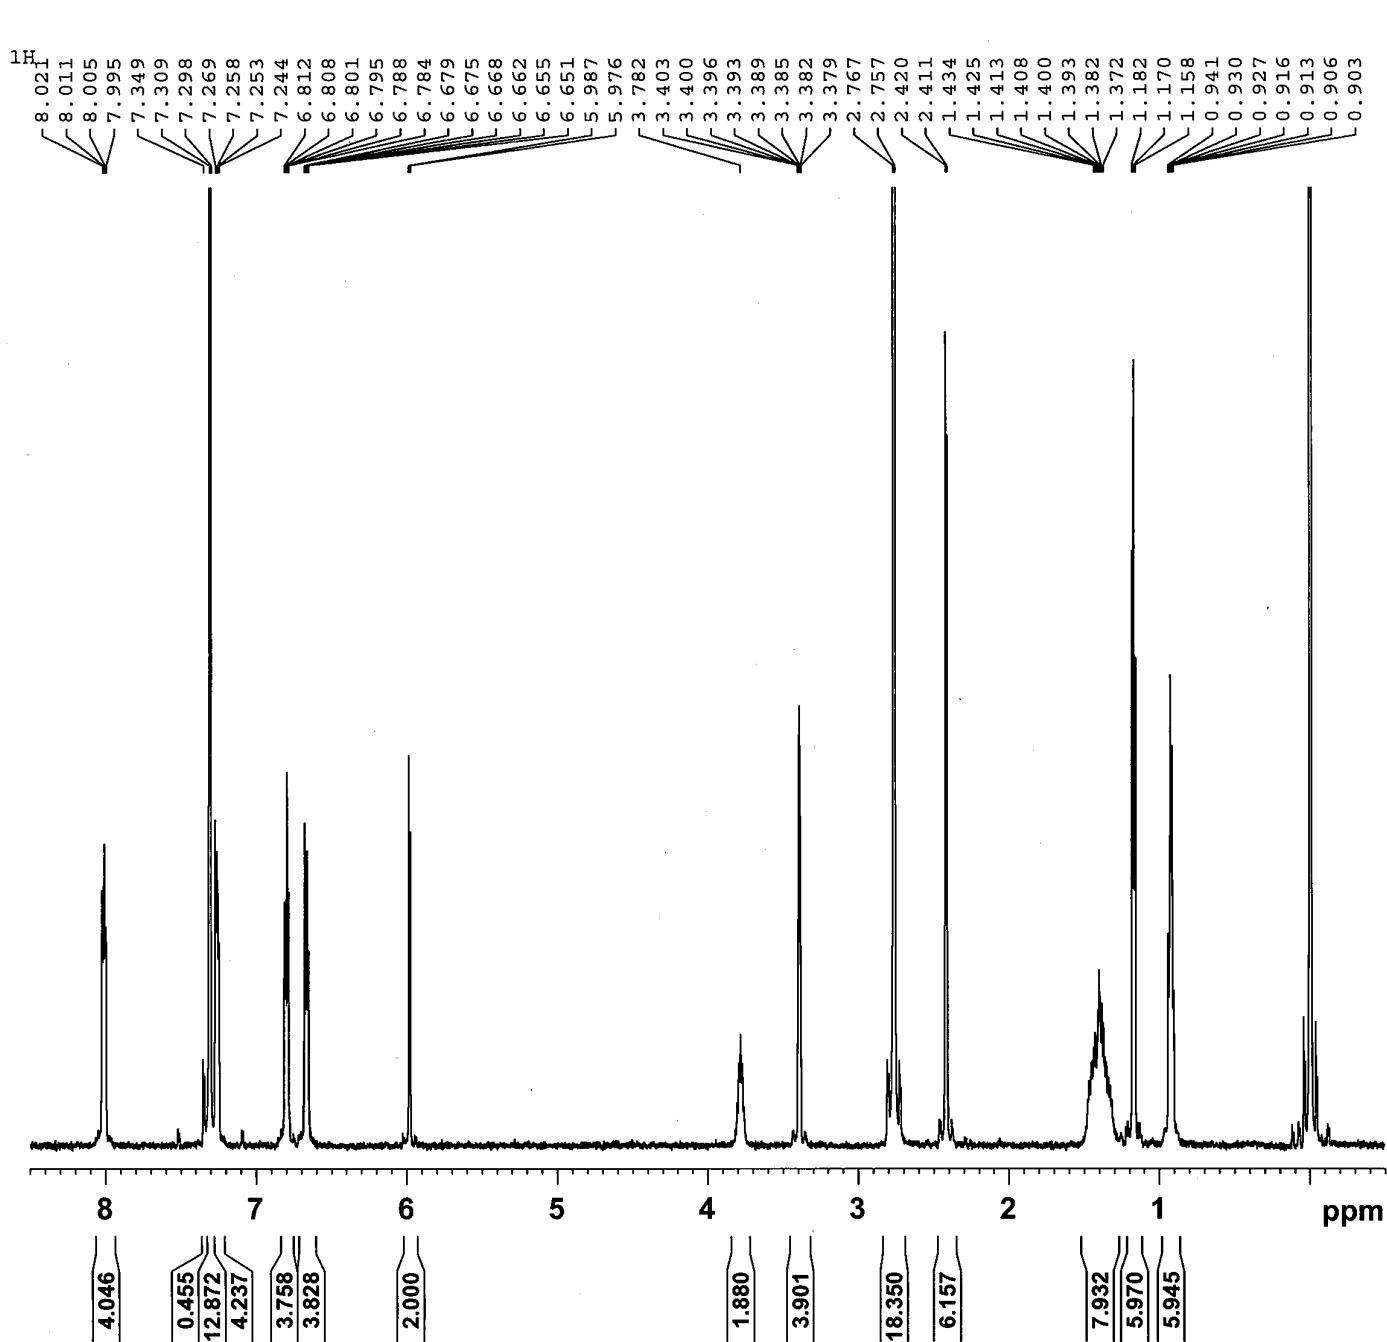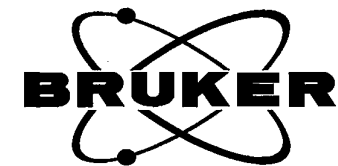

```

NAME          kodama
EXPNO         5
PROCNO        1
Date_         20140122
Time_         19.14
INSTRUM       spect
PROBHD        5 mm PABBO BB-
PULPROG       zg30
TD            65536
SOLVENT       CDCl3
NS            8
DS            2
SWH           10330.578 Hz
FIDRES        0.157632 Hz
AQ            3.1719923 sec
RG            203
DW            48.400 usec
DE            6.50 usec
TE            299.7 K
D1            1.0000000 sec
TD0           1
  
```

```

----- CHANNEL f1 -----
NUC1          1H
P1            11.80 usec
PL1           2.40 dB
PL1W          15.17711735 W
SFO1          500.0330885 MHz
SI            32768
SF            500.0299904 MHz
WDW           EM
SSB           0
LB            0.30 Hz
GB            0
PC            1.00
  
```

Figure S2. <sup>1</sup>H NMR spectrum of **1p·2O** salt obtained from a 2-pentanol solution.
